# Supplementary material for: A simple aqueous electrochemical method to synthesize TiO2 nanoparticles
Source: Royal Society of Chemistry journal article supplement (doi:10.1039/c5cp05525c), 2015-01-01
Supplement: c5cp05525c1.pdf [file c5cp05525c1.pdf]

## Supplementary Information

### SIMPLE AQUEOUS ELECTROCHEMICAL METHOD TO SYNTHESIZE TiO<sub>2</sub> NANOPARTICLES

Ivan Bezares<sup>1</sup>, Adolfo del Campo<sup>2</sup>, Pilar Herrasti<sup>1</sup>, Alexandra Muñoz-Bonilla<sup>1</sup>

<sup>1</sup>Departamento de Química Física Aplicada, Facultad de Ciencias, Universidad Autónoma de Madrid, C/Francisco Tomás y Valiente, 7, Cantoblanco, 28049 Madrid, Spain.

<sup>2</sup>Electroceramic Department, Instituto de Cerámica y Vidrio, CSIC, Kelsen 5, Madrid 28049, Spain.

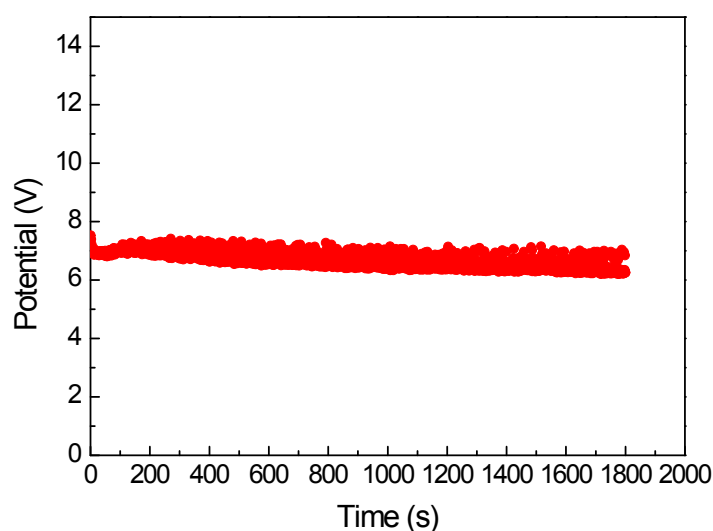

**Figure S1.** Dependence of the potential with reaction time in a 0.04 tetrabutylammonium bromide aqueous solution under a current of 100 mA.

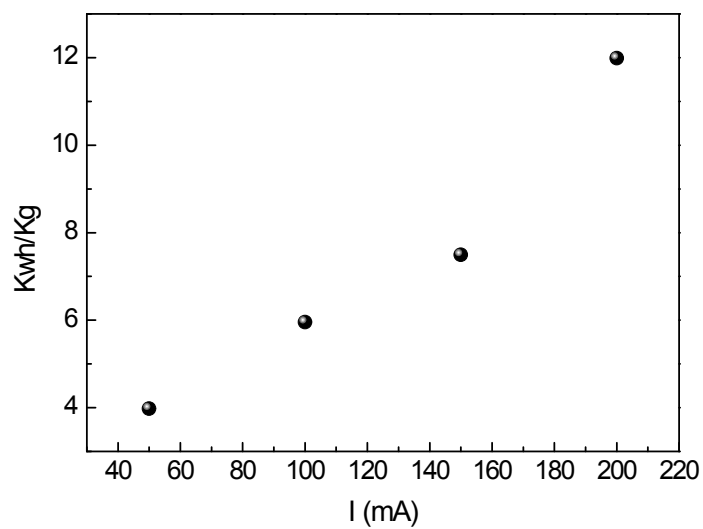

**Figure S2.** Energy consumption as function of the applied current in the electrosynthesis of titanium oxide nanoparticles at a reaction time of 30 min.

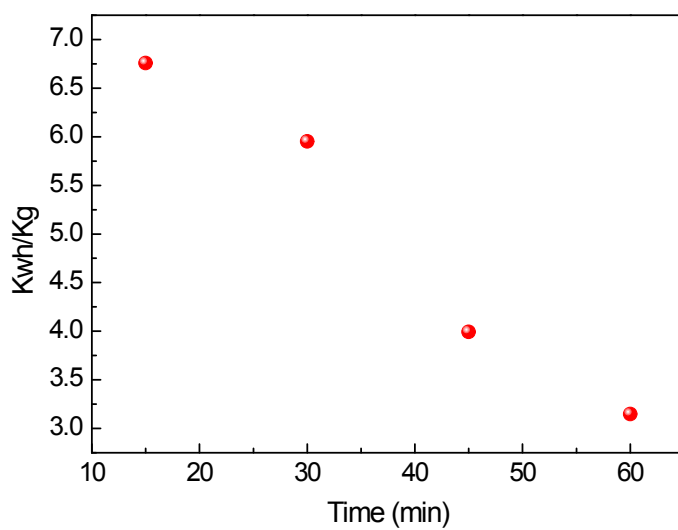

**Figure S3.** Energy consumption as function of the reaction time in the electrosynthesis of titanium oxide nanoparticles with an applied current of 100 mA.
